# Supplementary material for: Astrocytes infected with Chlamydia pneumoniae demonstrate altered expression and activity of secretases involved in the generation of β-amyloid found in Alzheimer disease
Source: PubMed Central journal article supplement (PMC6383264; doi:10.1186/s12868-019-0489-5), 2019-02-20
Supplement: 12868_2019_489_MOESM1_ESM.pdf [file 12868_2019_489_MOESM1_ESM.pdf]

**Table 1. AD-associated genes whose expression was significantly altered in *Cpn*-infected cells relative to uninfected cells at 6 hpi**

| <b>Gene symbol</b> | <b>Gene description</b>                                                                 | <b>Fold regulation</b> | <b>p-value</b> |
|--------------------|-----------------------------------------------------------------------------------------|------------------------|----------------|
| ABCA1              | ATP-binding cassette, sub-family A (ABC1), member 1                                     | 2.69                   | <0.001         |
| ACHE               | Acetylcholinesterase                                                                    | 4.02                   | 0.016          |
| APBA1              | Amyloid beta (A4) precursor protein-binding, family A, member 1                         | -6.69                  | 0.030          |
| APBA3              | Amyloid beta (A4) precursor protein-binding, family A, member 3                         | 1.45                   | 0.006          |
| APH1A              | Anterior pharynx defective 1 homolog A ( <i>C. elegans</i> )                            | 1.20                   | 0.023          |
| APLP1              | Amyloid beta (A4) precursor-like protein 1                                              | 1.58                   | 0.006          |
| APP                | Amyloid beta (A4) precursor protein                                                     | 1.33                   | 0.010          |
| CASP3              | Caspase 3, apoptosis-related cysteine peptidase                                         | 1.64                   | 0.008          |
| CASP4              | Caspase 4, apoptosis-related cysteine peptidase                                         | 2.30                   | <0.001         |
| CDK1               | Cyclin-dependent kinase 1                                                               | -1.62                  | 0.047          |
| CLU                | Clusterin                                                                               | 1.65                   | 0.027          |
| CTSC               | Cathepsin C                                                                             | 1.42                   | 0.021          |
| CTSG               | Cathepsin G                                                                             | 1.48                   | 0.025          |
| CTSL               | Cathepsin L1                                                                            | 1.45                   | 0.001          |
| EP300              | E1A binding protein p300                                                                | 1.47                   | 0.044          |
| ERN1               | Endoplasmic reticulum to nucleus signaling 1                                            | 1.95                   | 0.040          |
| GNAO1              | Guanine nucleotide binding protein (G protein), alpha activating activity polypeptide O | -1.83                  | 0.014          |
| GNAZ               | Guanine nucleotide binding protein (G protein), alpha z polypeptide                     | -1.78                  | 0.012          |
| GNB1               | Guanine nucleotide binding protein (G protein), beta polypeptide 1                      | 1.52                   | 0.013          |
| GNG11              | Guanine nucleotide binding protein (G protein), gamma 11                                | 1.89                   | 0.017          |
| GNG4               | Guanine nucleotide binding protein (G protein), gamma 4                                 | 22.52                  | 0.001          |
| GSK3A              | Glycogen synthase kinase 3 alpha                                                        | 1.29                   | 0.006          |
| GSK3B              | Glycogen synthase kinase 3 beta                                                         | 1.56                   | 0.042          |
| HSD17B10           | Hydroxysteroid (17-beta) dehydrogenase 10                                               | 1.21                   | 0.015          |
| IDE                | Insulin-degrading enzyme                                                                | -1.16                  | 0.017          |
| IL1A               | Interleukin 1, alpha                                                                    | 18.12                  | 0.001          |
| INSR               | Insulin receptor                                                                        | -1.53                  | 0.006          |

|          |                                                                                     |       |       |
|----------|-------------------------------------------------------------------------------------|-------|-------|
| LPL      | Lipoprotein lipase                                                                  | 2.14  | 0.013 |
| LRP8     | Low density lipoprotein receptor-related protein 8, apolipoprotein e receptor       | -1.70 | 0.010 |
| MAPT     | Microtubule-associated protein tau                                                  | -1.82 | 0.042 |
| PKP4     | Plakophilin 4                                                                       | -2.02 | 0.005 |
| PLAT     | Plasminogen activator, tissue                                                       | 2.56  | 0.050 |
| PLAU     | Plasminogen activator, urokinase                                                    | 2.47  | 0.000 |
| PRKCG    | Protein kinase C, gamma                                                             | 3.80  | 0.021 |
| PRKCI    | Protein kinase C, iota                                                              | 1.26  | 0.014 |
| PRKCQ    | Protein kinase C, theta                                                             | -1.57 | 0.009 |
| PSEN1    | Presenilin 1                                                                        | 2.39  | 0.005 |
| PSEN2    | Presenilin 2 (Alzheimer disease 4)                                                  | 1.17  | 0.009 |
| SERPINA3 | Serpin peptidase inhibitor, clade A (alpha-1 antiproteinase, antitrypsin), member 3 | 27.73 | 0.010 |
| UBQLN1   | Ubiquilin 1                                                                         | 1.33  | 0.003 |

**Table 2. AD-associated genes whose expression was significantly altered in *Cpn*-infected cells relative to uninfected cells at 24 hpi**

| <b>Gene symbol</b> | <b>Gene description</b>                                                                  | <b>Fold regulation</b> | <b>p-value</b> |
|--------------------|------------------------------------------------------------------------------------------|------------------------|----------------|
| A2M                | Alpha-2-macroglobulin                                                                    | -2.92                  | 0.005          |
| ACHE               | Acetylcholinesterase                                                                     | 2.53                   | 0.030          |
| ADAM10             | ADAM metalloproteinase domain 10                                                         | 1.40                   | 0.013          |
| APBA1              | Amyloid beta (A4) precursor protein-binding, family A, member 1                          | -5.48                  | 0.004          |
| APOA1              | Apolipoprotein A-I                                                                       | -1.70                  | 0.006          |
| BACE1              | Beta-site APP-cleaving enzyme 1                                                          | 1.27                   | 0.013          |
| BDNF               | Brain-derived neurotrophic factor                                                        | 2.16                   | 0.004          |
| CDK1               | Cyclin-dependent kinase 1                                                                | 1.17                   | 0.012          |
| CTSB               | Cathepsin B                                                                              | -1.27                  | 0.010          |
| CTSL               | Cathepsin L1                                                                             | -1.13                  | 0.036          |
| EP300              | E1A binding protein p300                                                                 | 1.41                   | 0.013          |
| GNAO1              | Guanine nucleotide binding protein (G protein), alpha activating activity polypeptide O  | -2.30                  | 0.008          |
| GNAZ               | Guanine nucleotide binding protein (G protein), alpha z polypeptide                      | -1.55                  | 0.036          |
| GNB1               | Guanine nucleotide binding protein (G protein), beta polypeptide 1                       | 1.23                   | 0.014          |
| GNG11              | Guanine nucleotide binding protein (G protein), gamma 11                                 | 3.19                   | <.001          |
| GNG3               | Guanine nucleotide binding protein (G protein), gamma 3                                  | -1.25                  | 0.007          |
| GNG4               | Guanine nucleotide binding protein (G protein), gamma 4                                  | 3.42                   | 0.004          |
| GNGT1              | Guanine nucleotide binding protein (G protein), gamma transducing activity polypeptide 1 | 4.91                   | 0.001          |
| GSK3B              | Glycogen synthase kinase 3 beta                                                          | 1.33                   | 0.016          |
| LRP1               | Low density lipoprotein receptor-related protein 1                                       | -1.95                  | 0.001          |
| MAP2               | Microtubule-associated protein 2                                                         | -2.17                  | 0.008          |
| MAPT               | Microtubule-associated protein tau                                                       | -3.98                  | 0.033          |
| NAE1               | NEDD8 activating enzyme E1 subunit 1                                                     | 1.42                   | 0.002          |
| NTRK1              | Neurotrophic tyrosine kinase, receptor, type 1                                           | -17.81                 | 0.006          |
| PLAT               | Plasminogen activator, tissue                                                            | 1.29                   | 0.044          |
| PLAU               | Plasminogen activator, urokinase                                                         | 9.57                   | <0.001         |

|          |                                                                                     |       |        |
|----------|-------------------------------------------------------------------------------------|-------|--------|
| PRKCD    | Protein kinase C, delta                                                             | -2.06 | 0.002  |
| PRKCE    | Protein kinase C, epsilon                                                           | -1.46 | 0.027  |
| PRKCQ    | Protein kinase C, theta                                                             | -2.58 | <0.001 |
| SERPINA3 | Serpin peptidase inhibitor, clade A (alpha-1 antiproteinase, antitrypsin), member 3 | 2.77  | 0.034  |
| UBQLN1   | Ubiquilin 1                                                                         | 1.81  | <0.001 |
| UQCRC1   | Ubiquinol-cytochrome c reductase core protein I                                     | 1.37  | 0.011  |
| UQCRC2   | Ubiquinol-cytochrome c reductase core protein II                                    | 1.21  | 0.033  |

**Table 3. AD-associated genes whose expression was significantly altered in *Cpn*-infected cells relative to uninfected cells at 48 hpi**

| <b>Gene symbol</b> | <b>Gene description</b>                                                                  | <b>Fold regulation</b> | <b>p-value</b> |
|--------------------|------------------------------------------------------------------------------------------|------------------------|----------------|
| A2M                | Alpha-2-macroglobulin                                                                    | -1.83                  | 0.008          |
| ABCA1              | ATP-binding cassette, sub-family A (ABC1), member 1                                      | -3.31                  | <0.001         |
| ADAM10             | ADAM metallopeptidase domain 10                                                          | 1.52                   | 0.025          |
| APP                | Amyloid beta (A4) precursor protein                                                      | -1.43                  | 0.002          |
| BACE1              | Beta-site APP-cleaving enzyme 1                                                          | 1.47                   | 0.004          |
| CDK1               | Cyclin-dependent kinase 1                                                                | 2.31                   | <0.001         |
| CLU                | Clusterin                                                                                | -1.65                  | 0.002          |
| CTSC               | Cathepsin C                                                                              | 1.24                   | 0.043          |
| CTSD               | Cathepsin D                                                                              | -1.70                  | 0.002          |
| CTSL               | Cathepsin L1                                                                             | -1.51                  | 0.001          |
| ERN1               | Endoplasmic reticulum to nucleus signaling 1                                             | -3.41                  | <0.001         |
| GNAO1              | Guanine nucleotide binding protein (G protein), alpha activating activity polypeptide O  | -3.41                  | <0.001         |
| GNB1               | Guanine nucleotide binding protein (G protein), beta polypeptide 1                       | 1.41                   | 0.031          |
| GNB5               | Guanine nucleotide binding protein (G protein), beta 5                                   | -1.23                  | 0.033          |
| GNG11              | Guanine nucleotide binding protein (G protein), gamma 11                                 | 4.14                   | <0.001         |
| GNG4               | Guanine nucleotide binding protein (G protein), gamma 4                                  | 1.90                   | 0.022          |
| GNGT1              | Guanine nucleotide binding protein (G protein), gamma transducing activity polypeptide 1 | 14.20                  | 0.009          |
| IL1A               | Interleukin 1, alpha                                                                     | 1.89                   | 0.044          |
| INSR               | Insulin receptor                                                                         | -1.74                  | 0.002          |
| LPL                | Lipoprotein lipase                                                                       | -2.34                  | 0.043          |
| LRP1               | Low density lipoprotein receptor-related protein 1                                       | -3.22                  | <0.001         |
| LRP8               | Low density lipoprotein receptor-related protein 8, apolipoprotein e receptor            | 1.41                   | 0.019          |
| MAP2               | Microtubule-associated protein 2                                                         | -1.68                  | 0.001          |
| MAPT               | Microtubule-associated protein tau                                                       | -2.38                  | 0.002          |
| NCSTN              | Nicastrin                                                                                | 1.27                   | 0.004          |
| NTRK1              | Neurotrophic tyrosine kinase, receptor, type 1                                           | -29.46                 | <0.001         |

|        |                                                 |       |       |
|--------|-------------------------------------------------|-------|-------|
| PKP4   | Plakophilin 4                                   | 1.54  | 0.001 |
| PLAT   | Plasminogen activator, tissue                   | 1.18  | 0.030 |
| PLAU   | Plasminogen activator, urokinase                | 2.11  | 0.008 |
| PRKCD  | Protein kinase C, delta                         | -1.50 | 0.033 |
| PRKCE  | Protein kinase C, epsilon                       | -1.71 | 0.045 |
| PRKCQ  | Protein kinase C, theta                         | -1.86 | 0.023 |
| PSEN2  | Presenilin 2 (Alzheimer disease 4)              | -1.55 | 0.029 |
| UBQLN1 | Ubiquilin 1                                     | 1.23  | 0.044 |
| UQCRC1 | Ubiquinol-cytochrome c reductase core protein I | 1.32  | 0.022 |

**Table 4. AD-associated genes whose expression was significantly altered in *Cpn*-infected cells relative to uninfected cells at 72 hpi**

| <b>Gene symbol</b> | <b>Gene description</b>                                                                 | <b>Fold regulation</b> | <b>p-value</b> |
|--------------------|-----------------------------------------------------------------------------------------|------------------------|----------------|
| A2M                | Alpha-2-macroglobulin                                                                   | -2.44                  | 0.003          |
| APLP1              | Amyloid beta (A4) precursor-like protein 1                                              | -2.76                  | 0.001          |
| APOE               | Apolipoprotein E                                                                        | -3.21                  | 0.042          |
| APP                | Amyloid beta (A4) precursor protein                                                     | -1.27                  | 0.010          |
| CLU                | Clusterin                                                                               | -1.60                  | 0.002          |
| GNAO1              | Guanine nucleotide binding protein (G protein), alpha activating activity polypeptide O | -1.72                  | 0.010          |
| GNG11              | Guanine nucleotide binding protein (G protein), gamma 11                                | 1.82                   | <0.001         |
| LRP1               | Low density lipoprotein receptor-related protein 1                                      | -2.03                  | 0.006          |
| MAP2               | Microtubule-associated protein 2                                                        | -1.45                  | 0.028          |
| MAPT               | Microtubule-associated protein tau                                                      | -1.81                  | 0.048          |
| NAE1               | NEDD8 activating enzyme E1 subunit 1                                                    | 1.26                   | 0.028          |
| NTRK1              | Neurotrophic tyrosine kinase, receptor, type 1                                          | -19.37                 | 0.012          |
| PLAU               | Plasminogen activator, urokinase                                                        | 2.54                   | 0.005          |
| PRKCQ              | Protein kinase C, theta                                                                 | -2.20                  | 0.025          |
| PRKCZ              | Protein kinase C, zeta                                                                  | -2.81                  | 0.014          |
| SNCA               | Synuclein, alpha (non A4 component of amyloid precursor)                                | 1.62                   | 0.004          |
| SNCB               | Synuclein, beta                                                                         | 1.79                   | 0.002          |
